# Supplementary material for: High Prevalence of Beta-Lactam-Resistant Escherichia coli in South Australian Grey-Headed Flying Fox Pups (Pteropus poliocephalus)
Source: MDPI journal article supplement (doi:10.3390/microorganisms10081589), 2022-08-07
Supplement: s1 [file s1]

**Supplementary Table S1.** Strain typing of 49 amoxicillin resistant *Escherichia coli* isolates from grey-headed flying fox pups using a combination of phylotyping, genome fingerprints (ERIC and CGG) and class 1 integron PCR data.

| Isolate ID | PG<br>PCR | ERIC<br>PCR<br>type | CGG<br>PCR<br>type | Integron<br>Integrase<br>PCR | Integron gene cassette PCRs            | WGS |
|------------|-----------|---------------------|--------------------|------------------------------|----------------------------------------|-----|
| FF1568B1   | A         | A-1                 | A-1                | Negative                     | -                                      | Yes |
| FF1563     | A/C       | A/C-1               | A/C-1              | Negative                     | -                                      | Yes |
| FF1575     | A/C       | A/C-1               | A/C-1              | Negative                     | -                                      | No  |
| FF1576A2   | A/C       | A/C-1               | A/C-1              | Negative                     | -                                      | No  |
| FF1565     | A/C       | A/C-2               | A/C-2              | Negative                     | -                                      | Yes |
| FF1566     | A/C       | A/C-2               | A/C-2              | Negative                     | -                                      | No  |
| FF1600     | A/C       | A/C-2               | A/C-2              | Negative                     | -                                      | No  |
| FF1568A    | A/C       | A/C-3               | A/C-3              | Negative                     | -                                      | Yes |
| FF1584B    | A/C       | A/C-3               | A/C-3              | Negative                     | -                                      | No  |
| FF1570A    | A/C       | A/C-4               | A/C-4              | Positive                     | HS458/JL-D2 positive (1 band, ~2kbp)   | Yes |
| FF1571     | A/C       | A/C-4               | A/C-4              | Positive                     | HS458/JL-D2 positive (1 band, ~2kbp)   | No  |
| FF1576A1-2 | A/C       | A/C-4               | A/C-4              | Positive                     | HS458/JL-D2 positive (1 band, ~2kbp)   | No  |
| FF1585B    | A/C       | A/C-4               | A/C-4              | Positive                     | HS458/JL-D2 positive (1 band, ~2kbp)   | No  |
| FF1589     | A/C       | A/C-4               | A/C-4              | Positive                     | HS458/JL-D2 positive (1 band, ~2kbp)   | No  |
| FF1570B1   | A/C       | A/C-5               | A/C-5              | Negative                     | -                                      | Yes |
| FF1397     | B1        | B1-1                | B1-1               | Negative                     | -                                      | No  |
| FF1410     | B1        | B1-1                | B1-1               | Negative                     | -                                      | No  |
| FF1412     | B1        | B1-1                | B1-1               | Negative                     | -                                      | No  |
| FF1418     | B1        | B1-1                | B1-1               | Negative                     | -                                      | No  |
| FF1419     | B1        | B1-1                | B1-1               | Negative                     | -                                      | No  |
| FF1532     | B1        | B1-1                | B1-1               | Negative                     | -                                      | Yes |
| FF1533     | B1        | B1-1                | B1-1               | Negative                     | -                                      | No  |
| FF1534     | B1        | B1-1                | B1-1               | Negative                     | -                                      | No  |
| FF1535     | B1        | B1-1                | B1-1               | Negative                     | -                                      | No  |
| FF1536     | B1        | B1-1                | B1-1               | Negative                     | -                                      | No  |
| FF1562     | B1        | B1-2                | B1-2               | Negative                     | -                                      | Yes |
| FF1572     | B1        | B1-3                | B1-3               | Negative                     | -                                      | Yes |
| FF1576A1-1 | B1        | B1-3                | B1-3               | Negative                     | -                                      | No  |
| FF1598     | B1        | B1-4                | B1-4               | Negative                     | -                                      | Yes |
| FF1582     | B1        | B1-5                | B1-5               | Positive                     | HS458/JL-D2 positive (3 bands, >800bp) | Yes |
| FF1583     | B1        | B1-5                | B1-5               | Positive                     | HS458/JL-D2 positive (3 bands, >800bp) | No  |
| FF1584A    | B1        | B1-5                | B1-5               | Positive                     | HS458/JL-D2 positive (3 bands, >800bp) | No  |
| FF1586     | B1        | B1-5                | B1-5               | Positive                     | HS458/JL-D2 positive (3 bands, >800bp) | No  |
| FF1587     | B1        | B1-5                | B1-5               | Positive                     | HS458/JL-D2 positive (3 bands, >800bp) | No  |
| FF1588     | B1        | B1-5                | B1-5               | Positive                     | HS458/JL-D2 positive (3 bands, >800bp) | No  |
| FF1590     | B1        | B1-5                | B1-5               | Positive                     | HS458/JL-D2 positive (3 bands, >800bp) | No  |
| FF1591     | B1        | B1-5                | B1-5               | Positive                     | HS458/JL-D2 positive (3 bands, >800bp) | No  |
| FF1593     | B1        | B1-5                | B1-5               | Positive                     | HS458/JL-D2 positive (3 bands, >800bp) | No  |
| FF1594     | B1        | B1-5                | B1-5               | Positive                     | HS458/JL-D2 positive (3 bands, >800bp) | No  |
| FF1595     | B1        | B1-5                | B1-5               | Positive                     | HS458/JL-D2 positive (3 bands, >800bp) | No  |
| FF1596     | B1        | B1-5                | B1-5               | Positive                     | HS458/JL-D2 positive (3 bands, >800bp) | No  |
| FF1597     | B1        | B1-5                | B1-5               | Positive                     | HS458/JL-D2 positive (3 bands, >800bp) | No  |
| FF1599     | B1        | B1-5                | B1-5               | Positive                     | HS458/JL-D2 positive (3 bands, >800bp) | No  |
| FF1567     | D/E       | D/E-1               | D/E-1              | Negative                     | -                                      | Yes |
| FF1569     | D/E       | D/E-1               | D/E-1              | Negative                     | -                                      | No  |
| FF1573     | D/E       | D/E-1               | D/E-1              | Negative                     | -                                      | No  |
| FF1574     | D/E       | D/E-1               | D/E-1              | Negative                     | -                                      | No  |
| FF1579     | D/E       | D/E-1               | D/E-1              | Negative                     | -                                      | No  |
| FF1581     | D/E       | D/E-1               | D/E-1              | Negative                     | -                                      | No  |

**Supplementary Table S2.** Individual BioSample accession numbers under NCBI Sequence Read Archive (SRA) BioProject ID PRJNA814458, EnteroBase Barcodes and GenBank accession numbers for class 1 integrons from 12 antimicrobial resistant *Escherichia coli* isolated from grey-headed flying fox pups in care.

| Isolate ID | ST   | Serotype | BioSample No. | EnteroBase Barcode | Integron GenBank accession No. |
|------------|------|----------|---------------|--------------------|--------------------------------|
| FF1563     | 10   | ONT:H32  | SAMN26553891  | ESC_UA2847AA       | -                              |
| FF1570A    | 48   | O4:H26   | SAMN26553892  | ESC_UA2853AA       | ON087280                       |
| FF1570B1   | 48   | B18:H11  | SAMN26553893  | ESC_UA2854AA       | -                              |
| FF1582     | 58   | O8:H25   | SAMN26553894  | ESC_UA2849AA       | ON087281                       |
| FF1598     | 58   | ONT:H37  | SAMN26553895  | ESC_UA2856AA       | -                              |
| FF1568A    | 361  | O9:H30   | SAMN26553896  | ESC_UA2851AA       | -                              |
| FF1562     | 641  | O70:H10  | SAMN26553897  | ESC_UA2846AA       | -                              |
| FF1565     | 710  | B9:H30   | SAMN26553898  | ESC_UA2848AA       | -                              |
| FF1567     | 963  | ONT:H18  | SAMN26553899  | ESC_UA2850AA       | -                              |
| FF1568B1   | 1421 | O9:H4    | SAMN26553900  | ESC_UA2852AA       | -                              |
| FF1572     | 1727 | ONT:H14  | SAMN26553901  | ESC_UA2855AA       | -                              |
| FF1532     | 2144 | O166:H49 | SAMN26553902  | ESC_UA2845AA       | -                              |

**Supplementary Table S3.** Antibiotic discs used for EUCAST susceptibility testing.

| Antibiotic and disc content (µg)      | OXOID disc | Antibiotic category and generation                                           | Breakpoint |
|---------------------------------------|------------|------------------------------------------------------------------------------|------------|
| Ampicillin (10 µg)                    | AMP10      | β-lactam/Penicillins                                                         | EUCAST     |
| Amoxicillin/Clavulanic Acid (30 µg)   | AMC30      | β-lactam/Penicillins + β-lactamase inhibitors                                | EUCAST     |
| Cephalexin (30 µg)                    | CL30       | β-lactam/Cephalosporins/1st Generation (Non-extended spectrum cephalosporin) | EUCAST     |
| Cefotaxime (5 µg)                     | CTX5       | β-lactam/Cephalosporins/3rd Generation (Extended-spectrum cephalosporin)     | EUCAST     |
| Imipenem (10 µg)                      | IPM10      | β-lactam/Carbapenems                                                         | EUCAST     |
| Nalidixic acid (30 µg)                | NA30       | Quinolones-Fluoroquinolones/<br>1st Generation Quinolone                     | CLSI       |
| Trimethoprim (5 µg)                   | W5         | Trimethoprim (Folate pathway inhibitors)                                     | EUCAST     |
| Trimethoprim/Sulfamethoxazole (30 µg) | SXT30      | Trimethoprim + Sulfonamide (Folate pathway inhibitors)                       | EUCAST     |
| Amikacin (30 µg)                      | AK30       | Aminoglycosides                                                              | EUCAST     |
| Gentamycin (10 µg)                    | CN10       | Aminoglycosides                                                              | EUCAST     |
| Streptomycin (25 µg)                  | S25        | Aminoglycosides                                                              | NA*        |
| Spectinomycin (25 µg)                 | SH25       | Aminoglycosides                                                              | NA*        |
| Chloramphenicol (30 µg)               | C30        | Phenicol                                                                     | EUCAST     |
| Nitrofurantoin (200 µg)               | F200       | Nitrofurantoin                                                               | NA*        |
| Tetracycline (30 µg)                  | TE30       | Tetracyclines                                                                | CLSI       |

\* NA = Not Available: Breakpoint criteria unavailable from EUCAST or CLSI tables.

**Supplementary Table S4.** URL links to interactive versions of GrapeTree cgMLST phylogeny trees for GHFF pup and closely related *E. coli* isolates in EnteroBase.

| ST and serotype | URL link                                                                                                                                                                                                                                                                                                                                                          |
|-----------------|-------------------------------------------------------------------------------------------------------------------------------------------------------------------------------------------------------------------------------------------------------------------------------------------------------------------------------------------------------------------|
| ST 10 ONT:H32   | <a href="https://achtman-lab.github.io/GrapeTree/MSTree_holder.html?tree=https://github.com/Fiona-McDougall/GHFF-Phylogenetics/blob/master/ST10_ONT_H32_n=39_ms_tree.json">https://achtman-lab.github.io/GrapeTree/MSTree_holder.html?tree=https://github.com/Fiona-McDougall/GHFF-Phylogenetics/blob/master/ST10_ONT_H32_n=39_ms_tree.json</a>                   |
| ST48 O4:H26     | <a href="https://achtman-lab.github.io/GrapeTree/MSTree_holder.html?tree=https://github.com/Fiona-McDougall/GHFF-Phylogenetics/blob/master/ST48_O4_H26_n=122_ms_tree.json">https://achtman-lab.github.io/GrapeTree/MSTree_holder.html?tree=https://github.com/Fiona-McDougall/GHFF-Phylogenetics/blob/master/ST48_O4_H26_n=122_ms_tree.json</a>                   |
| ST48 B18:H11    | <a href="https://achtman-lab.github.io/GrapeTree/MSTree_holder.html?tree=https://github.com/Fiona-McDougall/GHFF-Phylogenetics/blob/master/ST48_B18_H11_n=166_ms_tree.json">https://achtman-lab.github.io/GrapeTree/MSTree_holder.html?tree=https://github.com/Fiona-McDougall/GHFF-Phylogenetics/blob/master/ST48_B18_H11_n=166_ms_tree.json</a>                 |
| ST58 O8:H25     | <a href="https://achtman-lab.github.io/GrapeTree/MSTree_holder.html?tree=https://github.com/Fiona-McDougall/GHFF-Phylogenetics/blob/master/ST58_O8_H25_n=439_ms_tree.json">https://achtman-lab.github.io/GrapeTree/MSTree_holder.html?tree=https://github.com/Fiona-McDougall/GHFF-Phylogenetics/blob/master/ST58_O8_H25_n=439_ms_tree.json</a>                   |
| ST58 ONT:H37    | <a href="https://achtman-lab.github.io/GrapeTree/MSTree_holder.html?tree=https://github.com/Fiona-McDougall/GHFF-Phylogenetics/blob/master/ST58_ONT_H37_n=130_ms_tree.json">https://achtman-lab.github.io/GrapeTree/MSTree_holder.html?tree=https://github.com/Fiona-McDougall/GHFF-Phylogenetics/blob/master/ST58_ONT_H37_n=130_ms_tree.json</a>                 |
| ST361 O9:H30    | <a href="https://achtman-lab.github.io/GrapeTree/MSTree_holder.html?tree=https://github.com/Fiona-McDougall/GHFF-Phylogenetics/blob/master/ST361_O9_H30_n=323_ms_tree.json">https://achtman-lab.github.io/GrapeTree/MSTree_holder.html?tree=https://github.com/Fiona-McDougall/GHFF-Phylogenetics/blob/master/ST361_O9_H30_n=323_ms_tree.json</a>                 |
| ST641 O70:H10   | <a href="https://achtman-lab.github.io/GrapeTree/MSTree_holder.html?tree=https://github.com/Fiona-McDougall/GHFF-Phylogenetics/blob/master/ST641_O70_H10_n=40_ms_tree.json">https://achtman-lab.github.io/GrapeTree/MSTree_holder.html?tree=https://github.com/Fiona-McDougall/GHFF-Phylogenetics/blob/master/ST641_O70_H10_n=40_ms_tree.json</a>                 |
| ST710 B9:H30    | <a href="https://achtman-lab.github.io/GrapeTree/MSTree_holder.html?tree=https://github.com/Fiona-McDougall/GHFF-Phylogenetics/blob/master/ST710_B9_H30_n=27_ms_tree.json">https://achtman-lab.github.io/GrapeTree/MSTree_holder.html?tree=https://github.com/Fiona-McDougall/GHFF-Phylogenetics/blob/master/ST710_B9_H30_n=27_ms_tree.json</a>                   |
| ST963 ONT:H18   | <a href="https://achtman-lab.github.io/GrapeTree/MSTree_holder.html?tree=https://github.com/Fiona-McDougall/GHFF-Phylogenetics/blob/master/ST963_ONT_H18_n=184_ms_tree.json">https://achtman-lab.github.io/GrapeTree/MSTree_holder.html?tree=https://github.com/Fiona-McDougall/GHFF-Phylogenetics/blob/master/ST963_ONT_H18_n=184_ms_tree.json</a>               |
| ST1421 O9:H4    | <a href="https://achtman-lab.github.io/GrapeTree/MSTree_holder.html?tree=https://github.com/Fiona-McDougall/GHFF-Phylogenetics/blob/master/ST1421_O9_H4_n=76_ms_tree.json">https://achtman-lab.github.io/GrapeTree/MSTree_holder.html?tree=https://github.com/Fiona-McDougall/GHFF-Phylogenetics/blob/master/ST1421_O9_H4_n=76_ms_tree.json</a>                   |
| ST1727 ONT:H14  | <a href="https://achtman-lab.github.io/GrapeTree/MSTree_holder.html?tree=https://github.com/Fiona-McDougall/GHFF-Phylogenetics/blob/master/ST1727_ALL_MINUS_H49_n=153_ms_tree.json">https://achtman-lab.github.io/GrapeTree/MSTree_holder.html?tree=https://github.com/Fiona-McDougall/GHFF-Phylogenetics/blob/master/ST1727_ALL_MINUS_H49_n=153_ms_tree.json</a> |
| ST2144 O166:H49 | <a href="https://achtman-lab.github.io/GrapeTree/MSTree_holder.html?tree=https://github.com/Fiona-McDougall/GHFF-Phylogenetics/blob/master/ST2144_O166_H49_n=80_ms_tree.json">https://achtman-lab.github.io/GrapeTree/MSTree_holder.html?tree=https://github.com/Fiona-McDougall/GHFF-Phylogenetics/blob/master/ST2144_O166_H49_n=80_ms_tree.json</a>             |
